1 **Development of RNA-based assay for rapid detection of SARS-CoV-2 in clinical samples**

2

3 <sup>1#</sup> Vinod Kumar, <sup>1#</sup> Suman Mishra, <sup>1#</sup> Rajni Sharma, <sup>2</sup> Jyotsana Agarwal, <sup>3</sup> Ujjala Ghoshal, <sup>4</sup> Tripti

4 Khanna, <sup>1</sup> Lokendra K. Sharma, <sup>1</sup> Santosh Kumar Verma, <sup>5</sup> Prabhakar Mishra, and <sup>1\*</sup> Swasti Tiwari

5

6 <sup>1</sup> Department of Molecular Medicine & Biotechnology, Sanjay Gandhi PGIMS, Raibareli Road,

7 Lucknow -226014, India;

8 <sup>2</sup> Department of Microbiology, Dr. Ram Manohar Lohia Institute of Medical Sciences, Lucknow,

9 226010;

10 <sup>3</sup> Department of Microbiology, Virology and COVID19 Lab, Sanjay Gandhi PGIMS, Raibareli

11 Road, Lucknow -226014, India;

12 <sup>4</sup> Indian Council of Medical Research, Ramalingaswami Bhawan, New Delhi, India;

13 <sup>5</sup> Department of Biostatistics and Health Informatics, Sanjay Gandhi PGIMS, Raibareli Road,

14 Lucknow -226014, India

15

16 # Equal authorship

17 **\*Corresponding author**

18 Prof. Swasti Tiwari,

19 Department of Molecular Medicine & Biotechnology

20 4th Floor PMSSY Building

21 Sanjay Gandhi Post Graduate Institute of Medical Science (SGPGIMS)

22 Raebareli Rd, Lucknow, Uttar Pradesh 226014, India

23 Email Address: [tiwaris@sgpgi.ac.in](mailto:tiwaris@sgpgi.ac.in)

24

25 **Disclosure:** A patent application has been filed (ref#202011018132) on subject matter described

26 in the publication.

27 **Abstract:**

28 The ongoing spread of pandemic coronavirus disease (COVID-19) is caused by Severe Acute  
29 Respiratory Syndrome coronavirus 2 (SARS-CoV-2). In the lack of specific drugs or vaccines for  
30 SARS-CoV-2, demands rapid diagnosis and management are crucial for controlling the outbreak  
31 in the community. Here we report the development of the first rapid-colorimetric assay capable of  
32 detecting SARS-CoV-2 in the human nasopharyngeal RNA sample in less than 30 minutes. We  
33 utilized a nanomaterial-based optical sensing platform to detect RNA-dependent RNA  
34 polymerase (*RdRp*) gene of SARS-CoV-2, where the formation of oligo probe-target hybrid led to  
35 salt-induced aggregation and changes in gold-colloid color from pink to blue in visible range.  
36 Accordingly, we found a change in colloid color from pink to blue in assay containing  
37 nasopharyngeal RNA sample from the subject with clinically diagnosed COVID-19. The colloid  
38 retained pink color when the test includes samples from COVID-19 negative subjects or human  
39 papillomavirus (HPV) infected women. The results were validated using nasopharyngeal RNA  
40 samples from suspected COVID-19 subjects (n=136). Using RT-PCR as gold standard, the assay  
41 was found to have 85.29% sensitivity and 94.12% specificity. The optimized method has detection  
42 limit as little as 0.5 ng of SARS-CoV-2 RNA. Overall, the developed assay rapidly detects SARS-  
43 CoV-2 RNA in clinical samples in a cost-effective manner and would be useful in pandemic  
44 management by facilitating mass screening.

45

46 **Key words:**

47 COVID-19, diagnosis, Ribonucleic acid, coronavirus disease, colorimetric test

48

49 **Introduction:**

50 Coronavirus disease is rapidly spreading across the world and raising severe global health  
51 concerns. In December 2019, China reported the first disease case in its Hubei Province. Based  
52 on the phylogenetic analysis, the identified novel coronavirus is named as Severe Acute  
53 Respiratory Syndrome Coronavirus 2 (SARS-CoV-2), and the disease spread by SARS-CoV-2  
54 is known as “COVID-19”, declared as a pandemic by World Health Organization  
55 (WHO)([https://www.who.int/emergencies/diseases/novel-coronavirus-](https://www.who.int/emergencies/diseases/novel-coronavirus-2019?gclid=EAlaIQobChMI-u-Pz9vW6QIVUyUrCh0kjAIOEAAAYASAAEgJ0pvD_BwERemuzzi)

56 [2019?gclid=EAlaIQobChMI-u-Pz9vW6QIVUyUrCh0kjAIOEAAAYASAAEgJ0pvD\\_BwERemuzzi](https://www.who.int/emergencies/diseases/novel-coronavirus-2019?gclid=EAlaIQobChMI-u-Pz9vW6QIVUyUrCh0kjAIOEAAAYASAAEgJ0pvD_BwERemuzzi)).

57 Despite global massive efforts to control the outbreak of COVID-19, this pandemic is still on the  
58 rise. To date, lack of approved medicine or vaccine impede escalated the management of the  
59 COVID-19 epidemic. In the absence of an effective treatment strategy, developing affordable  
60 screening for rapid diagnosis is critically required in the management of COVID-19 (Udugama et  
61 al. 2020). According to the WHO, the immediate priority is the development of point-of-care tests  
62 for the detection of SARS-CoV-2 at an early stage with improved sensitivity(Report of the WHO-  
63 China Joint Mission on Coronavirus Disease 2019 (COVID-19); WHO 2017).

64 Currently, the COVID-19 diagnostic test falls into two categories: antibody and nucleic acid-based  
65 detection systems. The Developed immunoassay is rapid but inefficient for the detection of the  
66 pathogen at an early stage of infection.(Udugama et al. 2020) Besides, WHO does not currently  
67 recommend the use of antigen-based rapid diagnostic tests for patient care, but encourages the  
68 related research to improve their performance and potential diagnostic utility (Division of Viral  
69 Diseases. CDC 2019-Novel Coronavirus (2019-nCoV) Real-Time RT-PCR Diagnostic Panel;  
70 Division of Viral Diseases 2020).

71 Among the nucleic acid-based detection systems, the WHO considered a Real-time polymerase  
72 chain reaction (RT-PCR) based method as a gold standard for COVID-19 testing (Division of Viral  
73 Diseases. CDC 2019-Novel Coronavirus (2019-nCoV) Real-Time RT-PCR Diagnostic Panel;  
74 Division of Viral Diseases 2020). The sample-to-result time of the quantitative RT-PCR (qRT-

75 PCR) was initially >4 hrs; however, constant efforts are underway to improve the turn-around time  
76 through automation. Besides, time-consuming process PCR based tests are expensive; they  
77 require sophisticated instruments and expertise (Udugama et al. 2020). Thus, other technologies,  
78 such as reverse transcription- loop-mediated isothermal amplification (RT-LAMP) (Kashir and  
79 Yaqinuddin 2020) and Genome-editing (Broughton et al. 2020), are being explored. These are  
80 promising technologies; however, the expected turn-around time would still be around 1 hour and  
81 may not be economical for mass screening, especially for the developing countries.

82 Nanomaterials based sensing platforms hold promise to develop rapid disease diagnostics.  
83 However, their limited use in the clinical setting is due to the need for sophisticated equipment  
84 (Chen et al. 2020; Qiu et al. 2020). A recent attempt to use antisense-nucleotide capped gold  
85 nanoparticles for N-gene based, COVID-19 detection could be a game changer (Moitra et al.  
86 2020). Whereas, WHO suggested that N-gene has a relatively weak analytical capability,  
87 compared to the *RdRp* gene, to detect COVID-19 infection (Corman et al. 2020). Moreover, the  
88 authors have demonstrated COVID-19 detection in a cellular-model system, and application in  
89 human samples has yet to be shown.

90 In this study, we report for the first time gold nanoparticles (AuNPs) based rapid colorimetric assay  
91 for visual eye detection of COVID-19 RNA in human samples designed to target *RdRp* specific  
92 gene target in very cost-effective manner with wide application of mass screening in field. We  
93 utilized the surface plasmon resonance property of AuNPs to detect unamplified COVID-19 RNA  
94 in human samples. The ability of AuNPs to preferentially adsorb ssRNA/ssDNA over  
95 dsDNA/dsRNA is the crucial concept of this assay. The single and double-stranded  
96 oligonucleotides have different electrostatic properties, which provide stability (via retaining  
97 natural color) and aggregation (which causes color change) of AuNPs in solution, respectively  
98 (Jain et al. 2006).

99

## 100 **Materials and Methods**

### 101 ***Chemicals:***

102 Citrate buffer stabilized AuNPs (10 nm diameter) was purchased from Alfa Aesar (Thermo Fisher  
103 Scientific India Private Limited). Phosphate Buffer Saline (PBS pH 7.0) and NaCl were procured  
104 from Sigma Aldrich.

### 105 ***Clinical samples:***

106 Nasopharyngeal RNA sample from subjects suspected have COVID-19 infection (n=136) were  
107 used. The COVID-19 testing of these subjects were done in the Indian Council of Medical  
108 Research (ICMR, India) approved diagnostic laboratory using Taqman-based RT-PCR kit  
109 (Labgun, lab, Genomics.co. Ltd, Republic of Korea). The study protocol to use clinical samples  
110 was approved by Institutional Human Ethics Committee SGPGIMS, Lucknow (Ref N.  
111 PGI/BE/327/2020). The cervical DNA samples from human papilloma virus (HPV) infected woman  
112 (n=2) was used as non-specific target control. The clinical Samples (cervical smear) for the HPV  
113 DNA test were processed using HPV Test Hybrid Capture® 2 protocol (QIAGEN). Samples with  
114 relative light units (RLU) /Cutoff Value ratios > 1.0 were considered as HPV positive and < 1.0  
115 were considered as HPV negative. Only HPV positive DNA samples were used during validation  
116 experiments.

### 117 ***In Vitro transcription (IVT) of SARS-CoV-2 RNA:***

118 The RNA (5ng) from confirmed COVID-19 positive human sample were first reverse transcribed  
119 with modified oligo dT primer having a T7 promoter sequence at its 5' end, and the resulting single  
120 stranded cDNA was further *In-vitro* transcribed (IVT) using HiScribe T7 Quick High Yield RNA  
121 Synthesis Kit according to the manufacturer's protocol (New England BioLabs Inc, NEB #E2050).  
122 The amplified RNA was than purified using Monarch RNA Cleanup Kit (New England BioLabs  
123 Inc.) and quantified by RNA HS reagent using Qubit system (Thermo Fisher Scientific).

124 ***Colorimetric assay for the detection of SARS-CoV-2 RNA:***

125 For colorimetric assay, reaction was set up in 10  $\mu$ L of reaction volume in sterile PCR tubes,  
126 containing **(a)** hybridization buffer containing 80mM NaCl, **(b)** 0.5  $\mu$ M oligo probe for *RdRp* genes,  
127 and **(c)** target RNA from positive patients or IVT RNA. The *RdRp* oligo probe (5'-  
128 GTGATATGGTCATGTGTGGCGG-3') was used to specifically detect the presence of SARS-  
129 CoV-2 RNA in the assay. In parallel, to measure the specificity of the assay, input genomes  
130 from different source such nasopharyngeal RNA from COVID negative subjects and HPV DNA  
131 from cervical cancer positive samples were used as negative controls. Similarly, non-template  
132 control (NTC) was also included to measure the background reactivity. In addition, to confirm the  
133 working principle of the assay, a different RNA template (isolated from pancreas) and pancreas  
134 specific *REG-3* (Regenerating islet-derived protein 3) gene oligo probe (5'-  
135 GTGCCTATGGCTCCTATTGCT-3') were used separately.

136 The final reaction mixture with above combinations was then denatured at 95°C for 30  
137 seconds, annealed at 60°C for 60 seconds and then cooled to room temperature for 10 minutes.  
138 Subsequently, 10 nM colloidal AuNPs (~10 nm) were added to the assay mixture and allowed to  
139 develop color for 1-2 minute.

140 ***Spectral studies and measurement of sensitivity:***

141 Absorption spectrum of the assay mixture was recorded in the range of 300 -700 nm. The peak  
142 shift from 520 nm (known as red-shift) and peak broadening after 520 nm were measured as a  
143 characteristic feature of the salt induced aggregation. Using various combinations of positive and  
144 negative controls (as discussed in the previous section) the specificity of reaction and aggregation  
145 were compared. Assay sensitivity was determined by serially diluting the input SARS-CoV-2 RNA  
146 from both the IVT synthesized and, synthetic SARS-CoV-2 control (nCov19 control kit by Applied  
147 Biosystems) ranging from 5- 0.1ng and 1-0.1ng concentrations respectively.

148 ***Statistical Analysis:***

149 Diagnostic accuracy of the new colour test was calculated by assuming RT-PCR as gold standard  
150 method. Sensitivity (True Positive rate), Specificity (True Negative rate) and overall accuracy  
151 (True positive and true negative rate) were calculated with 95% confidence interval. Likelihood  
152 ratio positive (sensitivity / false positive rate), Likelihood ratio negative (false negative rate /  
153 specificity), Positive predictive value (True positive value / Total positive results predicted by  
154 colour test), Negative predictive value (True negative value / Total negative results predicted by  
155 colour test) were also calculated. Measured accuracy was considered statistically significant  
156 ( $p < 0.05$ ) when 50% did not falling within the confidence limit for values given in % whereas LR  
157 are considered significant when 1 was falling within confidence limit. Statistical analyses were  
158 performed using software MedCalc for Windows (MedCalc Software, Ostend, Belgium).

### 159 **Result and discussion:**

160 In this study, we report for the first time the development of a rapid and affordable RNA-based  
161 assay for the visual detection of the SARS-CoV-2 genome in human samples. Using RT-PCR as  
162 gold standard, the developed assay was found to have a sensitivity of 85.29% and specificity of  
163 94.12%. For the assay, we use surface plasmon resonance property of gold  
164 nanoparticles/colloids (AuNP) and targeted the *RdRp* specific gene sequence of SARS-CoV-  
165 2. *RdRp* is essential for viral replication and has higher analytical power than E (envelope protein)  
166 and N (nucleocapsid protein) genes of SARS-CoV-2 (Corman et al. 2020). Our current  
167 established assay, salt-induced aggregation and color change of the gold colloids occurs  
168 after *RdRp* oligo probe hybridizes with its specific target RNA of SARS-CoV-2. With the current  
169 escalated demand of cost effective, easy and sensitive diagnostic for COVID-19, the test was  
170 developed using commercially available nCoV19 synthetic DNA and validated further using  
171 clinical samples from COVID-19 subjects (as confirmed using Taqman based RT-PCR method,  
172 Table S1). In our study, we demonstrated a visual change in gold colloid color from pink to blue  
173 when RNA samples from subjects with clinically diagnosed COVID-19 infection hybridize

174 with *RdRp* oligo probe. Simultaneously, the color remained pink in SARS-CoV-2 negative  
175 samples due to the absence of hybridization.

176 In the study, out of 136 samples, 50% samples (n=68) were true positive (COVID-19 Positive)  
177 and 50% samples (n=68) true negative (Free from COVID-19 disease) confirmed by gold standard  
178 diagnostic test RT-PCR. These true positive and negative samples were again tested by New  
179 Colour test to assess the diagnostic accuracy of our new test **(Table 1)**. Result showed that  
180 sensitivity (true positive rate) of the new test was 85.29% (58/68) and specificity (true negative  
181 rate) of 94.12% (64/68) with statistically significant (each p value<0.05). Overall diagnostic  
182 accuracy of the new colour test was 89.71% (122/136) with statistically significant (p<0.05).  
183 Likelihood ratio positive indicated that new colour test has 14.50 times more chances to detect  
184 true positive rate (w.r.t. false positive rate) and Likelihood ratio negative of 0.16 i. new colour test  
185 has 6.25 times more chances to detect true negative rate (w.r.t. false negative rate). (each  
186 p<0.05). Positive predicted value (PPV) of 93.55% showed that probability to the correct  
187 prediction of true positive results from its own positive predicted results would be 93.55% and  
188 Negative predictive value (NPV) of 86.49% showed that probability to the correct prediction of  
189 true negative results from its own negative predicted results would be 86.49% (each p<0.05)  
190 **(Table 2)**.

191 Figure 1 illustrates the sequential schematics of process of the developed test. The color of the  
192 gold colloid solution is dependent on the aggregation property of AuNPs in suspension (Hunter  
193 1991; Lazarides and Schatz 2000). The aggregation-induced color change can be visually  
194 monitored (by the naked eye) and quantitated through absorption spectroscopy. Generally, in  
195 aqueous solution, gold colloids remain stabilized by the coating of negatively charged citrate ions  
196 (Grabar et al. 1995) and have visible appearance of pink color (Figure 1). In solution, individual  
197 particle exhibits a surface plasmon resonance peak ( $\lambda_{max}$ ) at 520 nm (Figure 2a, Green curve).  
198 The oligonucleotide probe preferentially adsorbs on AuNPs and provides additional stability due  
199 to the addition of negative charges (Li and Rothberg 2004). The same phenomenon was observed



200 in our experiments when *RdRp* oligo probe adsorbed and protected the salt-induced aggregation  
201 of colloid in the absence of target RNA (NTC) (Figure 2a, Grey curve). Except for the reduced  
202 intensity of the absorption spectrum, which was due to dilution of the colloid (Figure 2a, Grey  
203 curve), NTC and AuNP assays showed no change? A pure colloid is pink in color (Inset of Figure  
204 2a left vial), which turns into light pink when it reacts with hybridization buffer containing oligo  
205 probe in equal volume (without target) (Inset of Figure 2a right vial). Unlike dsDNA, inherent  
206 structural flexibility of ssDNA/RNA to partially uncoil its bases, exposing them to AuNPs,  
207 generates the attractive electrostatic forces causing them to allow over colloids and giving  
208 protection against electrostatic interaction causing salt-induced aggregation (Li and Rothberg  
209 2004).

210 In this assay, SARS-CoV-2 RNA from human patients or IVT synthesized RNA was added into  
211 hybridization buffer (containing oligo probe), followed by denaturation and annealing at 95°C (30s)  
212 and 60°C (60s), respectively. After cooling at room temperature, the gold colloid was added into  
213 the above reaction mixture. The colloid color changes in visible range from pink to blue, indicate  
214 the formation of hybridized product (Figure 2b-c, and Figure 3). Broadening of the peak with red-  
215 shift (~30 nm) was observed in the spectrum of aggregated colloids than non-aggregated,  
216 confirms the success of developed assay for detection of an unamplified target with unmodified  
217 colloids in a quick and facile way. The principle of binding oligo probe to its specific target leading  
218 to change in color of the solution was independently verified using a different template RNA  
219 (isolated from pancreas tissue) and pancreas specific gene *REG3* oligo probe in a separate  
220 assay. This assay also resulted in a similar change in color and absorption spectra as optimized  
221 earlier for SARS-CoV-2 RNA and *RdRp* oligo probe. It established the working principle and  
222 specificity of the test (Figure S1).

223 We determined the cross-reactivity using a cervical-DNA sample from women diagnosed with  
224 HPV infection (non-specific target control). No color change of gold colloids was observed with  
225 HPV DNA, indicating no hybridization, and specificity of the developed assay (Figure 3 b, right

226 vial). Contrary to HPV DNA-negative control and NTC, a positive control sample shows  
227 development of blue color (Figure 3 b, middle vial). Absorption spectrum (of colloids) with HPV  
228 DNA-negative control exhibited characteristics similar to that of NTC, and no red-shift or peak  
229 broadening as found with positive samples (Figure 3a). Cross-reactivity of the developed assay  
230 with other respiratory viruses is warranted. However, we do not anticipate the same as the test  
231 utilizes the detection of *the RdRp* gene of the SARS-CoV-2 virus. The oligo probe sequence used  
232 in our assay is not complementary to any human mRNAs and other members of the SARS family,  
233 as verified by BLAST using the NCBI database.

234 IVT synthesized SARS-CoV-2 RNA was used to test the sensitivity of the developed assay. RNA  
235 ranging from 0.1 to 5ng resulted in a gradual change in colloid color from light pink to blue (Figure  
236 4b). The color difference at 0.1 ng, compared to NTC, is barely visible with naked eyes (Figure 4  
237 b extreme left vial). However, the absorption spectra of colloids show a clear red-shift with peak  
238 broadening up till 0.5 ng target RNA (Figure 4a).

239 We also determined the assay sensitivity using different dilutions (1-0.1ng) of PCR-amplified  
240 synthetic DNA (positive control, with nCoV19 control kit). Similar to IVT synthesized RNA, a  
241 decreasing amount of DNA (from 1 to 0.1 ng) show a gradual change in colloid color from blue to  
242 light pink (left to right, Fig. 4d). A clear red-shift with peak broadening reflects in the absorption  
243 spectra of colloids recorded with control DNA, compared to NTC (Fig. 4c). Accordingly, positive  
244 control showed a clear visual demarcation up to 0.5 ng amount, compared to NTC (Fig. 4d). A  
245 similar recent approach utilizes thiol capped gold nanoparticles to detect N-gene of the SARS-  
246 CoV-2 gene in a cellular system (Moitra et al. 2020). However, for the detection of SARS-CoV-2  
247 RNA in human samples, the N-gene has reportedly inferior analytical power than the *RdRp* gene  
248 (Corman et al. 2020). Thus, it would be essential to know the assay's performance, developed by  
249 Moitra et al., with clinical samples.

250

251 **Conclusions:**

252 We have successfully developed an affordable gold nanoparticles-based colorimetric test for the  
253 rapid detection of SARS-CoV-2 RNA in humans. The assay can detect up to 0.5 ng of SARS-  
254 CoV-2 RNA. The turnaround time of our assay is less than 30 minutes. Moreover, the developed  
255 test will be helpful for mass screening, as it does not require sophisticated equipment. However,  
256 while analyzing the clinical samples we observed the assay works best with the freshly isolated  
257 RNA samples. In addition, pH and salt concentration in the elution buffer, used for RNA isolation,  
258 may affect the result and hence optimization may be needed when using a different kit for RNA  
259 isolation.

260 **Acknowledgement:**

261 The study was supported by intramural grants (A-24-PGI/IMP/81/2020) and overhead funds from  
262 the extramural grants to ST from DBT, ICMR and MHRD. The authors wish to thank the technical  
263 staff of the Department of Microbiology (SGPGIMS, Lucknow and RMLIMS, Lucknow) for RNA  
264 extraction and RT-PCR analysis for the clinical diagnosis of subjects.

265 **Contributions:**

266 ST, VK; conceived the idea; ST, VK, SM, RS; performed the experiments, JY, UG; provided clinical  
267 samples and the diagnosis; TK, LS, PM and SKV; provided critical comments on the manuscript  
268 draft; ST, VK and SM; drafted the manuscript.

269 **Competing Interest:**

270 The study was supported by by intramural grants (A-24-PGI/IMP/81/2020) and overhead funds  
271 extramural grants supported to ST from DBT, ICMR and MHRD. However, the funders do not  
272 have any role in designing, execution and results of the study. A patent on the subject matter has  
273 been filed by SGPGIMS with ST, and VK as inventors. All other co-authors declare no financial  
274 and intellectual conflict of interest.

275

276

277 **Supplementary Files:**

278 Supplementary information supporting the finding of this study is available in this article as  
279 supporting information.

280 **References:**

281 Broughton, J.P., Deng, X., Yu, G., Fasching, C.L., Servellita, V., Singh, J., Miao, X., Streithorst,  
282 J.A., Granados, A., Sotomayor-Gonzalez, A., Zorn, K., Gopez, A., Hsu, E., Gu, W., Miller, S., Pan,  
283 C.-Y., Guevara, H., Wadford, D.A., Chen, J.S., Chiu, C.Y., 2020. CRISPR–Cas12-based  
284 detection of SARS-CoV-2. *Nature Biotechnology*.

285  
286 Chen, Z., Zhang, Z., Zhai, X., Li, Y., Lin, L., Zhao, H., Bian, L., Li, P., Yu, L., Wu, Y., Lin, G., 2020.  
287 Rapid and Sensitive Detection of anti-SARS-CoV-2 IgG, Using Lanthanide-Doped Nanoparticles-  
288 Based Lateral Flow Immunoassay. *Analytical Chemistry* 92(10), 7226-7231.

289  
290 Corman, V.M., Landt, O., Kaiser, M., Molenkamp, R., Meijer, A., Chu, D.K., Bleicker, T., Brünink,  
291 S., Schneider, J., Schmidt, M.L., Mulders, D.G., Haagmans, B.L., van der Veer, B., van den Brink,  
292 S., Wijsman, L., Goderski, G., Romette, J.-L., Ellis, J., Zambon, M., Peiris, M., Goossens, H.,  
293 Reusken, C., Koopmans, M.P., Drosten, C., 2020. Detection of 2019 novel coronavirus (2019-  
294 nCoV) by real-time RT-PCR. *Euro Surveill* 25(3), 2000045.

295  
296 Division of Viral Diseases. CDC 2019-Novel Coronavirus (2019-nCoV) Real-Time RT-PCR  
297 Diagnostic Panel; Division of Viral Diseases, U.S.C.f.D.C.a.P., 2020.

298  
299 Grabar, K.C., Freeman, R.G., Hommer, M.B., Natan, M.J., 1995. Preparation and  
300 Characterization of Au Colloid Monolayers. *Analytical Chemistry* 67(4), 735-743.

301  
302 [https://www.who.int/emergencies/diseases/novel-coronavirus-2019?gclid=EAlaIqObChMI-u-](https://www.who.int/emergencies/diseases/novel-coronavirus-2019?gclid=EAlaIqObChMI-u-Pz9vW6QIVUyUrCh0kJAlOEAAAYASAAEgJ0pvD_BwERemuzzi)  
303 [Pz9vW6QIVUyUrCh0kJAlOEAAAYASAAEgJ0pvD\\_BwERemuzzi](https://www.who.int/emergencies/diseases/novel-coronavirus-2019?gclid=EAlaIqObChMI-u-Pz9vW6QIVUyUrCh0kJAlOEAAAYASAAEgJ0pvD_BwERemuzzi).

304  
305 Hunter, R.J.F.o.C.S.O.U.P.I.N.Y., 2001. Shaw, D. J. *Colloid and Surface Chemistry*; Butterworth-  
306 Heinemann Ltd.: Oxford., 1991.

307  
308 Jain, P.K., Lee, K.S., El-Sayed, I.H., El-Sayed, M.A., 2006. Calculated Absorption and Scattering  
309 Properties of Gold Nanoparticles of Different Size, Shape, and Composition: Applications in  
310 Biological Imaging and Biomedicine. *The Journal of Physical Chemistry B* 110(14), 7238-7248.

311  
312 Kashir, J., Yaqinuddin, A., 2020. Loop mediated isothermal amplification (LAMP) assays as a  
313 rapid diagnostic for COVID-19. *Med Hypotheses* 141, 109786.

314  
315 Lazarides, A.A., Schatz, G.C., 2000. DNA-Linked Metal Nanosphere Materials: Structural Basis  
316 for the Optical Properties. *The Journal of Physical Chemistry B* 104(3), 460-467.

317  
318 Li, H., Rothberg, L., 2004. Colorimetric detection of DNA sequences based on electrostatic  
319 interactions with unmodified gold nanoparticles. *Proceedings of the National Academy of*  
320 *Sciences of the United States of America* 101(39), 14036-14039.

321

322 Moitra, P., Alafeef, M., Dighe, K., Frieman, M.B., Pan, D., 2020. Selective Naked-Eye Detection  
323 of SARS-CoV-2 Mediated by N Gene Targeted Antisense Oligonucleotide Capped Plasmonic  
324 Nanoparticles. ACS nano, acsnano.0c03822.

325

326 Qiu, G., Gai, Z., Tao, Y., Schmitt, J., Kullak-Ublick, G.A., Wang, J., 2020. Dual-Functional  
327 Plasmonic Photothermal Biosensors for Highly Accurate Severe Acute Respiratory Syndrome  
328 Coronavirus 2 Detection. ACS Nano 14(5), 5268-5277.

329 Report of the WHO-China Joint Mission on Coronavirus Disease 2019 (COVID-19); WHO, 2017.

330

331 Udugama, B., Kadhiresan, P., Kozlowski, H.N., Malekjahani, A., Osborne, M., Li, V.Y.C., Chen,  
332 H., Mubareka, S., Gubbay, J.B., Chan, W.C.W., 2020. Diagnosing COVID-19: The Disease and  
333 Tools for Detection. ACS Nano 14(4), 3822-3835.

334

335

336

337

338

339

340

341

342

343

344

345

346

347

348

349 **Figure 1.**

350

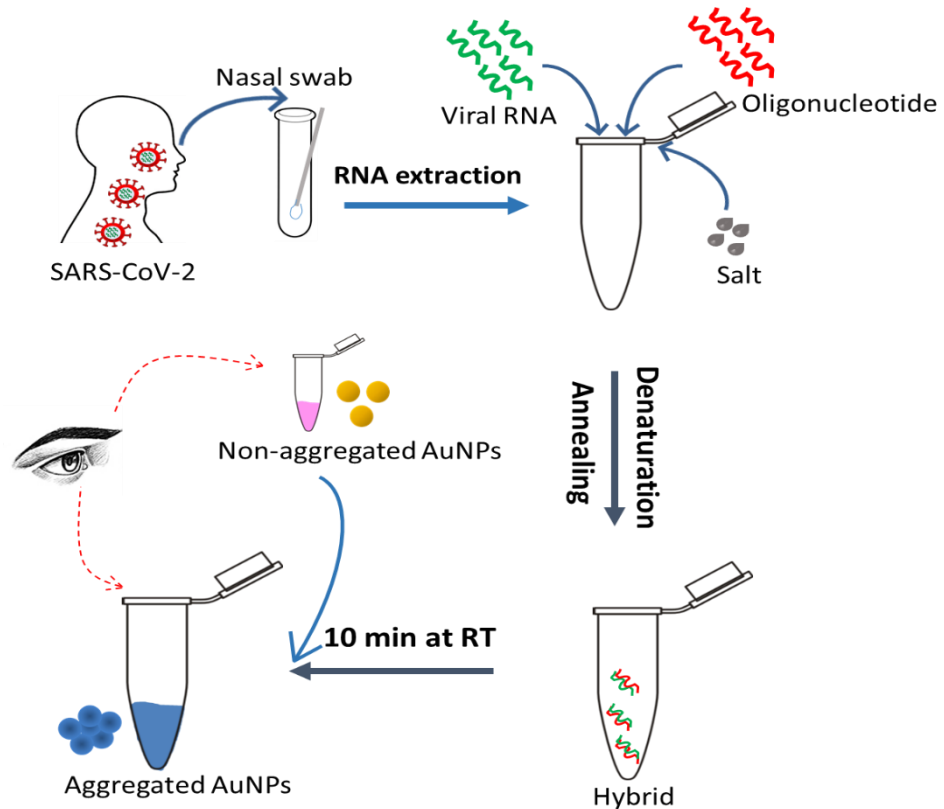

**Figure 1. Schematic representation of the assay for the visual detection of SARS-CoV-2 RNA**

Schematic illustrates the assay flow to detect *RdRp* (RNA dependent RNA polymerase) gene sequence of SARS-CoV-2 in the nasopharyngeal RNA sample from subject clinically diagnosed with nCOVID infection (**positive control**). Hybridization buffer with *RdRp* oligo probe (forward) was mixed with RNA sample. The reaction mixture was denatured at 95°C for 30 seconds, followed by annealing at 60° C for 60 seconds. After annealing, the tube was kept at room temperature for 10 minutes before colloidal AuNPs were added. A pure colloid is pink in color. It turns blue in the vial containing RNA sample from **positive control** due to salt-induced aggregation upon successful hybridization between oligo probe and target RNA. The color remained pink in the absence of target RNA, or the presence of a non-specific target.

351 **Figure 2.**

352

353

354

355

356

357

358

359

360

361

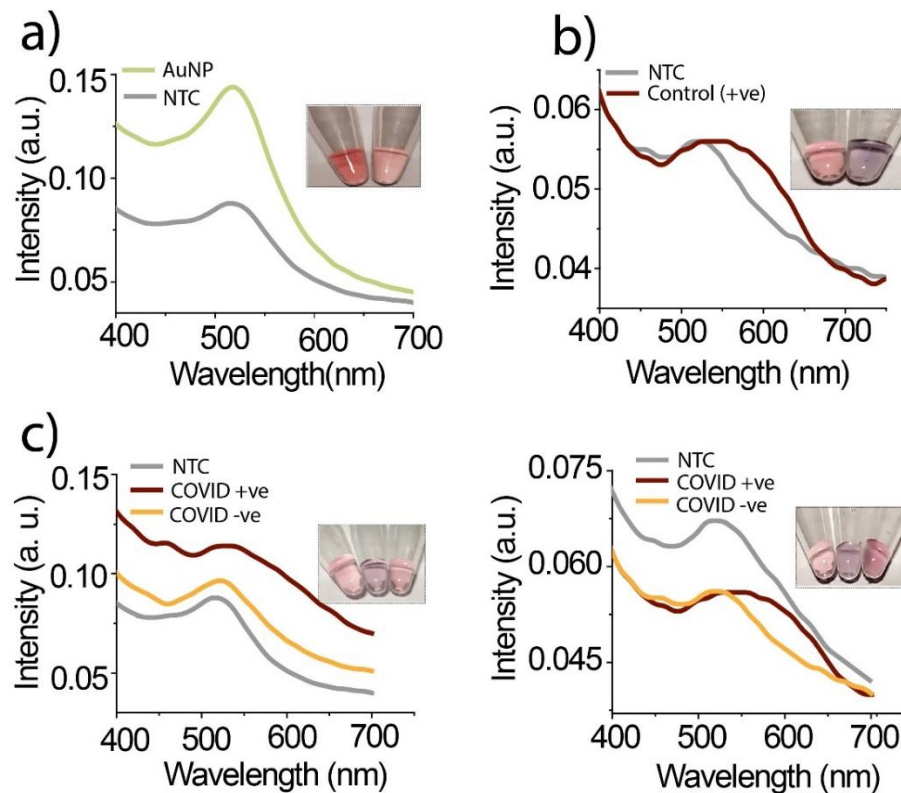

**Figure 2. Colorimetric assay to detect SARS-CoV-2 RNA.**

**(a)** Comparative absorption spectra of unmodified AuNPs (Green curve) and oligo probe stabilized AuNPs i.e., NTC (Grey curve). Both spectra are exhibiting characteristics absorption peak at  $\lambda_{max}$  520 nm, however, the reduced peak intensity in NTC is due to dilution of colloid solution. In NTC, no red-shift in peak position, approve the stabilizing property of single-stranded oligo probe, Optical images of gold colloids (left vial) and NTC (right vial) are shown in the inset. **(b)** Comparative absorption spectra of NTC (Grey curve) and positive control i.e., nasopharyngeal RNA sample from subject clinically diagnosed with nCOVID infection (Brown curve). Broadening of the peak as well as red-shift in peak position confirm the salt-induced aggregation of AuNP due to successful hybrid formation in control. Optical images shown in inset demonstrate the evident change in the color of the solution from pink to blue in the control vial (right) while no change in color of NTC vial (left). **(c)** representative absorption spectra, and in the inset shows optical images comparing assay performed with NTC (Grey curves, left vial), RNA from clinically diagnosed nCOVID infected subjects (Brown curve, middle vial), and RNA from subjects without nCOVID infection (Yellow curve, right vial). Samples from a total of eighteen infected and eighteen uninfected individuals were analyzed (optical images were attached as supplimentary figure S2).

362

363

364

365 **Figure 3.**

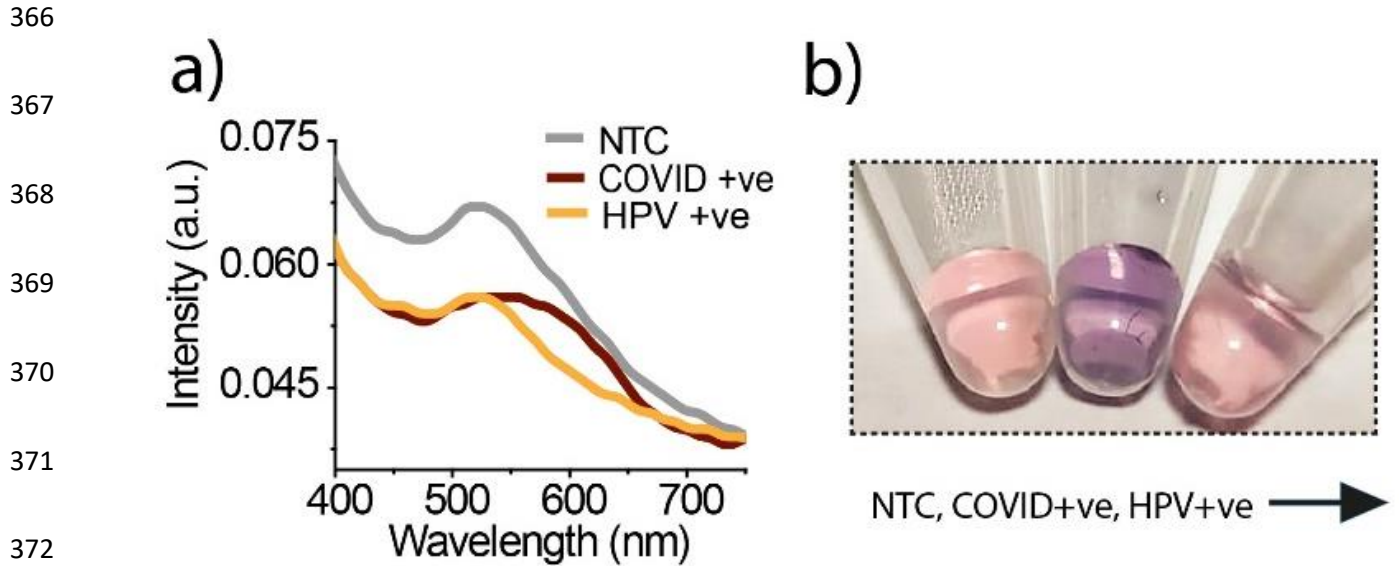

**Figure 3. Specificity of developed assay to detect SARS-CoV-2 RNA.**

Nasopharyngeal-RNA from nCOVID infected subject (positive control), and a cervical DNA sample from Human papillomavirus (HPV, non-specific target control) infected women were tested. **(a)** Comparative absorption spectra for no target control (NTC, Grey curve), positive control (Brown curve), and non-specific target control (HPV, Yellow curve). In the positive control, the broadening of the peak and red-shift in peak position (Brown curve) confirmed the salt-induced aggregation upon successful hybrid formation. **(b)** Optical pictures demonstrate that the colloid color from pink to blue changes only in the vial with the positive control (middle vial), while the color remained pink in the vial with NTC (left vial) or HPV (right vial).

373

374

375



376 **Figure 4.**

377

378

379

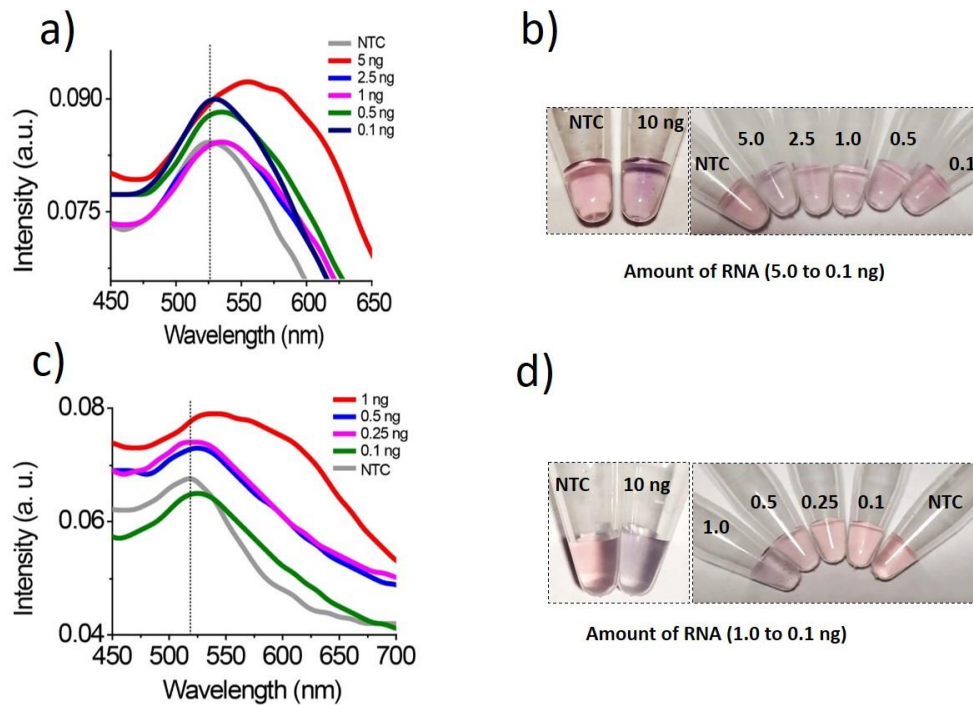

**Figure 4. Sensitivity of developed assay to detect SARS-CoV-2 RNA.**

Assay sensitivity was determined using different concentrations (concentration are in ng) of IVT synthesized SARS-CoV-2 RNA (a-b), or nCOVID synthetic DNA (c-d). Absorption spectra (a and c) corresponding to aggregated colloids exhibit a clear red-shift in peak with broadening, indicating successful hybridization. Optical pictures (b & d) of the assay performed to demonstrate the color change, an extra pair of vials (on the left) to show color change with a higher amount (10ng) of target nucleic acid for the reference

| Table 1: Comparison of New Colour test by comparison to RT-PCR. (N=136) |              |                                  |           |            |
|-------------------------------------------------------------------------|--------------|----------------------------------|-----------|------------|
|                                                                         |              | RT-PCR<br>(Gold Standard Method) |           | Total      |
|                                                                         |              | Positive                         | Negative  |            |
| New Colour<br>Test                                                      | Positive     | 58                               | 4         | <b>62</b>  |
|                                                                         | Negative     | 10                               | 64        | <b>74</b>  |
|                                                                         | <b>Total</b> | <b>68</b>                        | <b>68</b> | <b>136</b> |

| Measurements                        | Value  | 95% CI |        | P Value |
|-------------------------------------|--------|--------|--------|---------|
|                                     |        | Lower  | Upper  |         |
| Sensitivity<br>(True positive rate) | 85.29% | 74.61% | 92.72% | <0.05   |
| Specificity<br>(True negative rate) | 94.12% | 85.62% | 98.37% | <0.05   |
| Likelihood Ratio Positive<br>(LR+)  | 14.50  | 5.58   | 37.71  | <0.05   |
| Likelihood Ratio Negative<br>(LR-)  | 0.16   | 0.09   | 0.28   | <0.05   |
| Positive Predictive Value<br>(PPV)  | 93.55% | 84.79% | 97.42% | <0.05   |
| Negative Predictive Value<br>(NPV)  | 86.49% | 78.26% | 91.92% | <0.05   |
| Overall Accuracy                    | 89.71% | 83.33% | 94.26% | <0.05   |

Above estimation are based on equal number of disease- and disease-free cases in study samples detected by Gold standard method.

382 **Supporting information**

383

384 **Development of RNA-based visual assay for rapid detection of SARS-CoV-2**  
385 **in clinical samples**

386 <sup>1#</sup> Vinod Kumar, <sup>1#</sup> Suman Mishra, <sup>1#</sup> Rajni Sharma, <sup>2</sup> Jyotsana Agarwal, <sup>3</sup> Ujjala Ghoshal, <sup>4</sup> Tripti  
387 Khanna, <sup>1</sup> Lokendra K. Sharma, <sup>1</sup> Santosh Kumar Verma, <sup>5</sup> Prabhakar Mishra and <sup>1</sup> Swasti Tiwari

388

389 <sup>1</sup>Department of Molecular Medicine & Biotechnology, Sanjay Gandhi PGIMS, Raibareli Road,  
390 Lucknow -226014, India;

391 <sup>2</sup> Department of Microbiology, Dr. Ram Manohar Lohia Institute of Medical Sciences, Lucknow,  
392 226010;

393 <sup>3</sup>Department of Microbiology, Virology and COVID19 Lab, Sanjay Gandhi PGIMS, Raibareli  
394 Road, Lucknow -226014, India;

395 <sup>4</sup>Indian Council of Medical Research, Ramalingaswami Bhawan, New Delhi, India;

396 <sup>5</sup>Department of Biostatistics and Health Informatics, Sanjay Gandhi PGIMS, Raibareli Road,  
397 Lucknow -226014, India

398

399

400

401

402

403

404

405

406

407 **Figure S1**

408

409

410

411

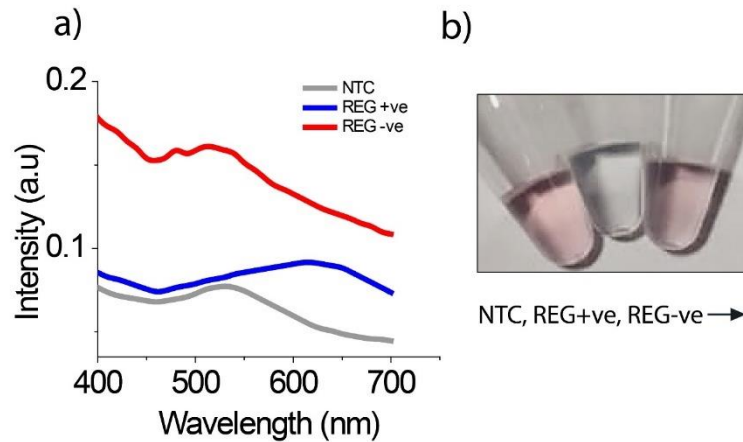

**Figure S1.** The assay was performed using an oligo probe specific for regenerating islet-derived (REG 3). The assay was containing RNA extracted from pancreatic tissue (positive control), placental RNA (negative control), or no RNA (NTC). **(a)** Comparative absorption spectra of NTC (Grey curve), positive control (Blue curve), and negative control (red curve). In the positive control, the broadening of the peak and red-shift in peak position (Blue curve) confirm the salt-induced aggregation upon successful hybrid formation. **(b)** Optical pictures demonstrate that the colloid color from pink to blue changes only in the vial with the positive control (middle vial), while the color remained pink in the vial with NTC (left vial) or negative control (non-specific target, right vial).

412 **Figure S2**

413

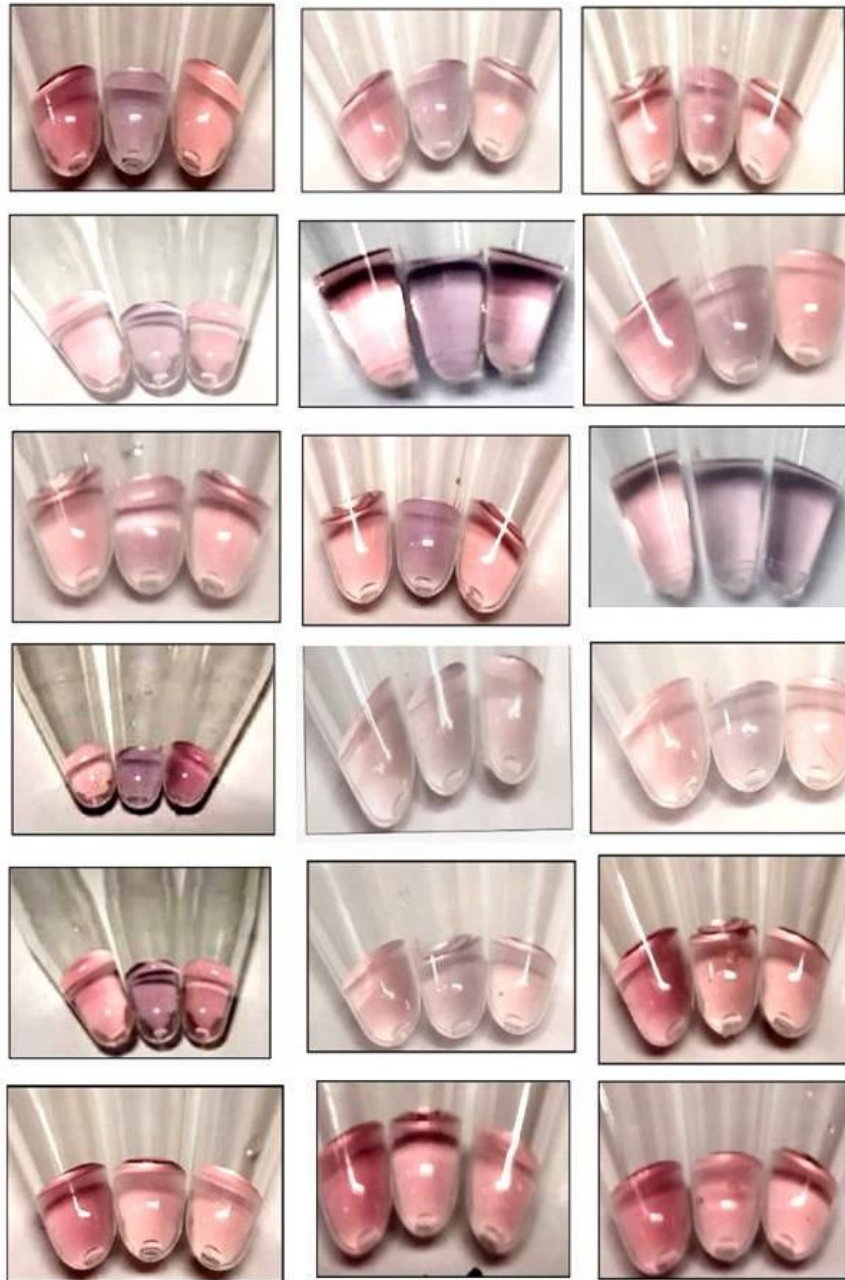

**Figure S2.** The figure shows optical images comparing assay performed with NTC (left vial), RNA from clinically diagnosed nCOVID infected subjects (middle vial), and RNA from subjects without nCOVID infection (right vial). Clinical diagnosis of the subjects based on Taqman RT-PCR analysis is given in Table S1

| S.No | E gene (Ct value) | RdRp (Ct Value) | Agreement with the new test |
|------|-------------------|-----------------|-----------------------------|
| 1    | 25.45             | 25.3            | Yes                         |
| 2    | 28.37             | 29.2            | Yes                         |
| 3    | -                 | -               | Yes                         |
| 4    | 22.66             | 21.2            | Yes                         |
| 5    | -                 | -               | Yes                         |
| 6    | -                 | -               | Yes                         |
| 7    | 22.81             | 24.59           | Yes                         |
| 8    | 23.16             | 22.66           | Yes                         |
| 9    | -                 | -               | Yes                         |
| 10   | -                 | -               | Yes                         |
| 11   | 29.64             | 25.56           | Yes                         |
| 12   | -                 | -               | Yes                         |
| 13   | 28.69             | 29.7            | NO                          |
| 14   | 24.86             | 24.12           | yes                         |
| 15   | 20.67             | 20.45           | yes                         |
| 16   | 23.87             | 23.46           | yes                         |
| 17   | 29.53             | 28.76           | NO                          |
| 18   | 23.74             | 23.67           | yes                         |
| 19   | 28.45             | 27.78           | NO                          |
| 20   | 28.19             | 27.76           | NO                          |
| 21   | 25.84             | 24.88           | yes                         |
| 22   | 28.22             | 27.65           | NO                          |
| 23   | 27.56             | 26.98           | yes                         |
| 24   | 24.67             | 24.34           | yes                         |
| 25   | -                 | -               | yes                         |
| 26   | -                 | -               | yes                         |
| 27   | -                 | -               | yes                         |
| 28   | -                 | -               | yes                         |
| 29   | -                 | -               | yes                         |
| 30   | -                 | -               | yes                         |
| 31   | -                 | -               | yes                         |
| 32   | -                 | -               | yes                         |
| 33   | -                 | -               | yes                         |
| 34   | -                 | -               | yes                         |
| 36   | -                 | -               | NO                          |

**Table S1.** The table shows the clinical diagnosis of the subjects based on Taqman RT-PCR analysis. RNA from the nasopharyngeal samples were analyzed by the new test (optical images shown in Figure S2). RNA samples received from clinical laboratories were re-elluted in RNAase free water before testing with new method.

433 **Figure S3**

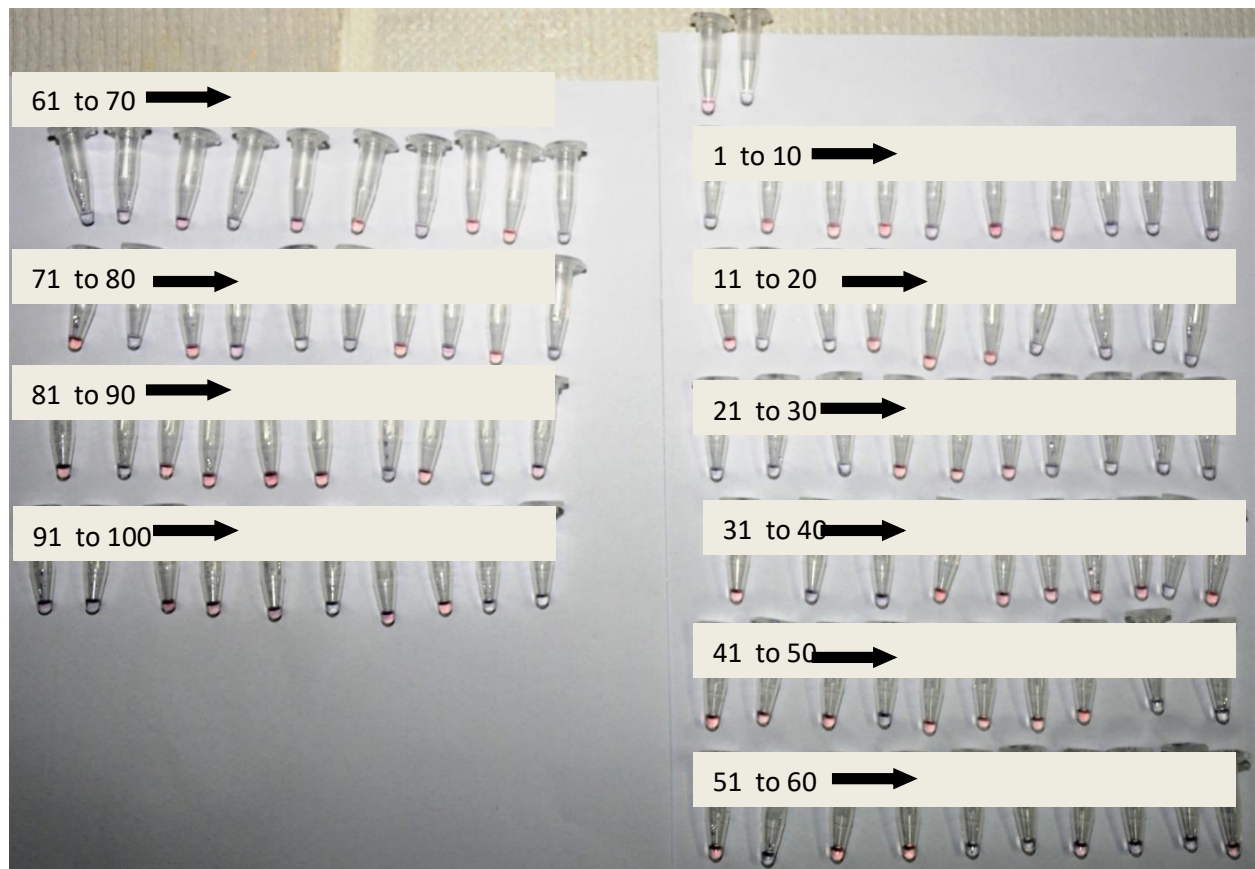

**Figure S3.** The figure shows optical images of the assay performed using 100 clinical samples from clinical laboratory at RMLS (Lucknow). Clinical diagnosis of the subjects based on Taqman RT-PCR analysis is given in Table S2



| Si No. | Code | Age | Gender | RT-PCR result (RMLMS) | E-Gene (CT value) | N- Gene (CT value) | RdRp (Ct value) | New test* |
|--------|------|-----|--------|-----------------------|-------------------|--------------------|-----------------|-----------|
| 1.     | 1    | 39  | M      | POSITIVE              | 23.14             | 24.37              | 23.64           | Yes       |
| 2.     | 2    | 47  | M      | NEGATIVE              | -                 | -                  |                 | Yes       |
| 3.     | 3    | 57  | M      | NEGATIVE              | -                 | -                  |                 | Yes       |
| 4.     | 4    | 53  | M      | NEGATIVE              | -                 | -                  |                 | Yes       |
| 5.     | 5    | 48  | F      | POSITIVE              | 26.67             | 26.44              | 26.21           | Yes       |
| 6.     | 6    | 62  | F      | NEGATIVE              | -                 | -                  |                 | Yes       |
| 7.     | 7    | 38  | F      | NEGATIVE              | -                 | -                  |                 | Yes       |
| 8.     | 8    | 43  | M      | NEGATIVE              | -                 | -                  |                 | <b>NO</b> |
| 9.     | 9    | 62  | F      | POSITIVE              | 21.17             | 21.36              | 21.68           | Yes       |
| 10.    | 10   | 57  | M      | POSITIVE              | 18.93             | 19.43              | 19.13           | Yes       |
| 11.    | 11   | 36  | F      | NEGATIVE              | -                 | -                  |                 | Yes       |
| 12.    | 12   | 48  | M      | POSITIVE              | 29.04             | 29.46              | 29.44           | Yes       |
| 13.    | 13   | 48  | F      | POSITIVE              | 18.15             | 19.34              | 19.65           | Yes       |
| 14.    | 14   | 60  | M      | NEGATIVE              | -                 | -                  |                 | Yes       |
| 15.    | 15   | 50  | F      | NEGATIVE              | -                 | -                  |                 | Yes       |
| 16.    | 16   | 45  | M      | POSITIVE              | 22.64             | 23.68              | 21.92           | <b>NO</b> |
| 17.    | 17   | 47  | M      | POSITIVE              | 27.78             | 27.16              | 27.04           | Yes       |
| 18.    | 18   | 49  | F      | POSITIVE              | 28.79             | 28.41              | 27.86           | Yes       |
| 19.    | 19   | 39  | F      | POSITIVE              | 29.56             | 28.18              | 29.03           | Yes       |
| 20.    | 20   | 71  | M      | POSITIVE              | 27.56             | 27.86              | 27.13           | Yes       |
| 21.    | 21   | 72  | M      | POSITIVE              | 28.92             | 28.48              | 27.89           | Yes       |
| 22.    | 22   | 58  | F      | POSITIVE              | 30.04             | 29.67              | 29.16           | Yes       |
| 23.    | 23   | 61  | F      | POSITIVE              | 30.86             | 30.64              | 30.78           | Yes       |
| 24.    | 24   | 59  | F      | NEGATIVE              | -                 | -                  |                 | Yes       |
| 25.    | 25   | 52  | M      | NEGATIVE              | -                 | -                  |                 | Yes       |
| 26.    | 26   | 51  | M      | NEGATIVE              | -                 | -                  |                 | Yes       |
| 27.    | 27   | 50  | M      | POSITIVE              | 29.06             | 28.06              | 29.65           | Yes       |
| 28.    | 28   | 40  | F      | POSITIVE              | 31.27             | 30.56              | 29.85           | Yes       |
| 29.    | 29   | 35  | M      | POSITIVE              | 28.06             | 28.67              | 28.96           | Yes       |
| 30.    | 30   | 28  | F      | POSITIVE              | 24.06             | 24.56              | 23.94           | Yes       |
| 31.    | 31   | 30  | M      | NEGATIVE              | -                 | -                  |                 | Yes       |
| 32.    | 32   | 37  | F      | POSITIVE              | 26.84             | 26.12              | 25.68           | Yes       |
| 33.    | 33   | 33  | M      | POSITIVE              | 27.47             | 26.84              | 26.22           | Yes       |
| 34.    | 34   | 38  | M      | NEGATIVE              | -                 | -                  |                 | Yes       |
| 35.    | 35   | 44  | M      | POSITIVE              | 26.18             | 26.56              | 27.14           | <b>NO</b> |
| 36.    | 36   | 45  | M      | POSITIVE              | 25.68             | 25.46              | 25.39           | <b>NO</b> |
| 37.    | 37   | 39  | M      | NEGATIVE              | -                 | -                  |                 | Yes       |
| 38.    | 38   | 26  | M      | NEGATIVE              | -                 | -                  |                 | Yes       |
| 39.    | 39   | 30  | F      | POSITIVE              | 24.09             | 23.67              | 24.44           | Yes       |
| 40.    | 40   | 38  | M      | NEGATIVE              | -                 | -                  |                 | Yes       |
| 41.    | 41   | 40  | F      | NEGATIVE              | -                 | -                  |                 | Yes       |
| 42.    | 42   | 29  | M      | NEGATIVE              | -                 | -                  |                 | Yes       |
| 43.    | 43   | 59  | F      | NEGATIVE              | -                 | -                  |                 | Yes       |
| 44.    | 44   | 65  | F      | POSITIVE              | 24.66             | 24.46              | 24.02           | Yes       |

|     |    |    |   |          |       |       |       |           |
|-----|----|----|---|----------|-------|-------|-------|-----------|
| 45. | 45 | 73 | M | NEGATIVE | -     | -     |       | Yes       |
| 46. | 46 | 54 | M | NEGATIVE | -     | -     |       | Yes       |
| 47. | 47 | 42 | M | NEGATIVE | -     | -     |       | Yes       |
| 48. | 48 | 39 | M | NEGATIVE | -     | -     |       | Yes       |
| 49. | 49 | 28 | M | POSITIVE | 16.78 | 17.68 | 18.62 | Yes       |
| 50. | 50 | 83 | F | POSITIVE | 28.07 | 27.84 | 26.83 | Yes       |
| 51. | 51 | 58 | F | NEGATIVE |       |       |       | Yes       |
| 52. | 52 | 61 | M | POSITIVE | 28.58 | 28.12 | 28.29 | Yes       |
| 53. | 53 | 74 | F | NEGATIVE |       |       |       | Yes       |
| 54. | 54 | 39 | M | POSITIVE | 26.78 | 26.14 | 26.98 | <b>NO</b> |
| 55. | 55 | 16 | F | POSITIVE | 26.19 | 27.04 | 26.87 | Yes       |
| 56. | 56 | 19 | F | POSITIVE | 24.04 | 23.68 | 23.55 | Yes       |
| 57. | 57 | 47 | M | NEGATIVE |       |       |       | Yes       |
| 58. | 58 | 36 | F | POSITIVE | 17.88 | 18.12 | 18.36 | Yes       |
| 59. | 59 | 25 | M | POSITIVE | 27.87 | 26.84 | 26.24 | Yes       |
| 60. | 60 | 29 | F | NEGATIVE | -     | -     |       | Yes       |
| 61. | 61 | 23 | M | POSITIVE | 23.94 | 23.66 | 24.15 | Yes       |
| 62. | 62 | 48 | F | POSITIVE | 22    | 22.68 | 22.34 | Yes       |
| 63. | 63 | 39 | M | NEGATIVE | -     | -     |       | Yes       |
| 64. | 64 | 29 | M | POSITIVE | 25.46 | 24.48 | 22.48 | Yes       |
| 65. | 65 | 51 | M | NEGATIVE | -     | -     |       | Yes       |
| 66. | 66 | 52 | M | NEGATIVE | -     | -     |       | Yes       |
| 67. | 67 | 48 | F | POSITIVE | 26.84 | 25.95 | 25.67 | Yes       |
| 68. | 68 | 23 | F | NEGATIVE | -     | -     |       | Yes       |
| 69. | 69 | 34 | F | NEGATIVE | -     | -     |       | Yes       |
| 70. | 70 | 47 | M | POSITIVE | 28.16 | 27.68 | 28.49 | Yes       |
| 71. | 71 | 46 | F | NEGATIVE | -     | -     |       | Yes       |
| 72. | 72 | 48 | M | POSITIVE | 26.84 | 26.46 | 27.05 | Yes       |
| 73. | 73 | 37 | F | NEGATIVE | -     | -     |       | Yes       |
| 74. | 74 | 29 | M | NEGATIVE | -     | -     |       | <b>NO</b> |
| 75. | 75 | 58 | F | POSITIVE | 23.56 | 23.98 | 23    | Yes       |
| 76. | 76 | 52 | M | POSITIVE | 30.27 | 29.61 | 29.98 | Yes       |
| 77. | 77 | 65 | F | NEGATIVE |       |       |       | Yes       |
| 78. | 78 | 61 | M | POSITIVE | 30.18 | 30.45 | 30.68 | Yes       |
| 79. | 79 | 71 | M | NEGATIVE | -     | -     |       | Yes       |
| 80. | 80 | 47 | M | NEGATIVE | -     | -     |       | <b>NO</b> |
| 81. | 81 | 27 | F | NEGATIVE | -     | -     |       | Yes       |
| 82. | 82 | 38 | F | POSITIVE | 28.18 | 27.84 | 27.99 | Yes       |
| 83. | 83 | 47 | M | NEGATIVE | -     | -     |       | Yes       |
| 84. | 84 | 39 | F | NEGATIVE | -     | -     |       | Yes       |
| 85. | 85 | 19 | F | NEGATIVE | -     | -     |       | Yes       |
| 86. | 86 | 42 | F | NEGATIVE | -     | -     |       | Yes       |
| 87. | 87 | 48 | M | POSITIVE | 28.64 | 28.87 | 28.15 | Yes       |
| 88. | 88 | 88 | M | POSITIVE | 26.84 | 26.38 | 26.78 | <b>NO</b> |
| 89. | 89 | 23 | M | POSITIVE | 28.42 | 28.03 | 28.56 | Yes       |
| 90. | 90 | 72 | M | NEGATIVE | -     | -     |       | Yes       |
| 91. | 91 | 67 | M | POSITIVE | 29.87 | 28.14 | 29.16 | Yes       |
| 92. | 92 | 58 | F | POSITIVE | 26.73 | 26.06 | 26.44 | Yes       |

|     |     |    |   |          |       |       |       |     |
|-----|-----|----|---|----------|-------|-------|-------|-----|
| 93. | 93  | 34 | F | NEGATIVE | -     | -     |       | Yes |
| 94. | 94  | 35 | F | NEGATIVE | -     | -     |       | Yes |
| 95. | 95  | 32 | M | NEGATIVE | -     | -     |       | Yes |
| 96. | 96  | 48 | M | POSITIVE | 27.64 | 27.16 | 27.88 | Yes |
| 97. | 97  | 56 | F | NEGATIVE | -     | -     |       | Yes |
| 98. | 98  | 45 | F | NEGATIVE | -     | -     |       | Yes |
| 99. | 99  | 56 | M | POSITIVE | 25.49 | 25.12 | 25.34 | Yes |
| 100 | 100 | 34 | M | POSITIVE | 26.78 | 25.88 | 26.45 | Yes |

434

**Table S2.** The table shows the clinical diagnosis of the subjects based on Taqman RT-PCR analysis. RNA extracted from the nasopharyngeal samples were analyzed by the new test (optical images shown in Figure S3). Nasopharyngeal samples Samples were collected and RNA was isolated at RMLMS (Lucknow).

435
